# Supplementary material
Source: publisher figshare collection journal article supplement (https://acs.figshare.com/ndownloader/files/3869161)
Supplement: Supplementary file 1 [file 3869161]

 
data_13 
 
_audit_creation_method            SHELXL-97 
_chemical_name_systematic 
; 
 ? 
; 
_chemical_name_common             ? 
_chemical_melting_point           ? 
_chemical_formula_moiety          ? 
_chemical_formula_sum 
 'C17 H18 Br F3 N2 O5' 
_chemical_formula_weight          467.24 
 
loop_ 
 _atom_type_symbol 
 _atom_type_description 
 _atom_type_scat_dispersion_real 
 _atom_type_scat_dispersion_imag 
 _atom_type_scat_source 
 'C'  'C'   0.0033   0.0016 
 'International Tables Vol C Tables 4.2.6.8 and 6.1.1.4' 
 'H'  'H'   0.0000   0.0000 
 'International Tables Vol C Tables 4.2.6.8 and 6.1.1.4' 
 'N'  'N'   0.0061   0.0033 
 'International Tables Vol C Tables 4.2.6.8 and 6.1.1.4' 
 'O'  'O'   0.0106   0.0060 
 'International Tables Vol C Tables 4.2.6.8 and 6.1.1.4' 
 'F'  'F'   0.0171   0.0103 
 'International Tables Vol C Tables 4.2.6.8 and 6.1.1.4' 
 'Br'  'Br'  -0.2901   2.4595 
 'International Tables Vol C Tables 4.2.6.8 and 6.1.1.4' 
 
_symmetry_cell_setting            orthorhombic
_symmetry_space_group_name_H-M    'P21212' 
_symmetry_space_group_name_Hall    'P 2 2ab'
_chemical_absolute_configuration   'unk' 
 
loop_ 
 _symmetry_equiv_pos_as_xyz 
 'x, y, z' 
 '-x, -y, z' 
 '-x+1/2, y+1/2, -z' 
 'x+1/2, -y+1/2, -z' 
 
_cell_length_a                    13.3503(15) 
_cell_length_b                    26.402(3) 
_cell_length_c                    11.0275(12) 
_cell_angle_alpha                 90.00 
_cell_angle_beta                  90.00 
_cell_angle_gamma                 90.00 
_cell_volume                      3886.9(7) 
_cell_formula_units_Z             8 
_cell_measurement_temperature     293(2) 
_cell_measurement_reflns_used     ? 
_cell_measurement_theta_min       ? 
_cell_measurement_theta_max       ? 
 
_exptl_crystal_description        block
_exptl_crystal_colour             ? 
_exptl_crystal_size_max           0.25 
_exptl_crystal_size_mid           0.21 
_exptl_crystal_size_min           0.19 
_exptl_crystal_density_meas       ? 
_exptl_crystal_density_diffrn     1.597 
_exptl_crystal_density_method     'not measured' 
_exptl_crystal_F_000              1888 
_exptl_absorpt_coefficient_mu     2.174 
_exptl_absorpt_correction_type    multi-scan 
_exptl_absorpt_correction_T_min   0.547599 
_exptl_absorpt_correction_T_max   1.000000 
_exptl_absorpt_process_details    
'Jacobson, R. (1998) Private communication' 
 
_exptl_special_details 
; 
 ? 
; 
 
_diffrn_ambient_temperature       293(2) 
_diffrn_radiation_wavelength      0.71073 
_diffrn_radiation_type            MoK\a 
_diffrn_radiation_source          'fine-focus sealed tube' 
_diffrn_radiation_monochromator   graphite 
_diffrn_measurement_device_type   ? 
_diffrn_measurement_method        ? 
_diffrn_detector_area_resol_mean  ? 
_diffrn_standards_number          ? 
_diffrn_standards_interval_count  ? 
_diffrn_standards_interval_time   ? 
_diffrn_standards_decay_%         ? 
_diffrn_reflns_number             33633 
_diffrn_reflns_av_R_equivalents   0.0503 
_diffrn_reflns_av_sigmaI/netI     0.0637 
_diffrn_reflns_limit_h_min        -17 
_diffrn_reflns_limit_h_max        17 
_diffrn_reflns_limit_k_min        -28 
_diffrn_reflns_limit_k_max        34 
_diffrn_reflns_limit_l_min        -14 
_diffrn_reflns_limit_l_max        14 
_diffrn_reflns_theta_min          1.54 
_diffrn_reflns_theta_max          27.49 
_reflns_number_total              8927 
_reflns_number_gt                 3968 
_reflns_threshold_expression      >2sigma(I) 
 
_computing_data_collection        ? 
_computing_cell_refinement        ? 
_computing_data_reduction         ? 
_computing_structure_solution     'SHELXS-97 (Sheldrick, 1990)' 
_computing_structure_refinement   'SHELXL-97 (Sheldrick, 1997)' 
_computing_molecular_graphics     ? 
_computing_publication_material   ? 
 
_refine_special_details 
; 
 Refinement of F^2^ against ALL reflections.  The weighted R-factor wR and 
 goodness of fit S are based on F^2^, conventional R-factors R are based 
 on F, with F set to zero for negative F^2^. The threshold expression of 
 F^2^ > 2sigma(F^2^) is used only for calculating R-factors(gt) etc. and is 
 not relevant to the choice of reflections for refinement.  R-factors based 
 on F^2^ are statistically about twice as large as those based on F, and R- 
 factors based on ALL data will be even larger. 
; 
 
_refine_ls_structure_factor_coef  Fsqd  
_refine_ls_matrix_type            full 
_refine_ls_weighting_scheme       calc  
_refine_ls_weighting_details 
 'calc w=1/[\s^2^(Fo^2^)+(0.0902P)^2^+1.4209P] where P=(Fo^2^+2Fc^2^)/3' 
_atom_sites_solution_primary      direct 
_atom_sites_solution_secondary    difmap 
_atom_sites_solution_hydrogens    geom 
_refine_ls_hydrogen_treatment     mixed 
_refine_ls_extinction_method      none 
_refine_ls_extinction_coef        ? 
_refine_ls_abs_structure_details 
 'Flack H D (1983), Acta Cryst. A39, 876-881' 
_refine_ls_abs_structure_Flack    0.029(17) 
_refine_ls_number_reflns          8927 
_refine_ls_number_parameters      505 
_refine_ls_number_restraints      84 
_refine_ls_R_factor_all           0.1517 
_refine_ls_R_factor_gt            0.0575 
_refine_ls_wR_factor_ref          0.1986 
_refine_ls_wR_factor_gt           0.1552 
_refine_ls_goodness_of_fit_ref    1.004 
_refine_ls_restrained_S_all       1.046 
_refine_ls_shift/su_max           0.002 
_refine_ls_shift/su_mean          0.000 
 
loop_ 
 _atom_site_label 
 _atom_site_type_symbol 
 _atom_site_fract_x 
 _atom_site_fract_y 
 _atom_site_fract_z 
 _atom_site_U_iso_or_equiv 
 _atom_site_adp_type 
 _atom_site_occupancy 
 _atom_site_symmetry_multiplicity 
 _atom_site_calc_flag 
 _atom_site_refinement_flags 
 _atom_site_disorder_assembly 
 _atom_site_disorder_group 
Br2 Br 0.83390(8) 0.42298(3) 1.43760(8) 0.1059(3) Uani 1 1 d . . . 
O7 O 0.8589(3) 0.60583(17) 1.0132(4) 0.0679(12) Uani 1 1 d . . . 
C28 C 0.8823(5) 0.6134(3) 1.1304(7) 0.067(2) Uani 1 1 d . . . 
C18 C 0.7821(5) 0.6794(3) 0.9475(7) 0.0671(19) Uani 1 1 d . . . 
N4 N 0.8645(4) 0.6504(2) 0.9412(5) 0.0739(17) Uani 1 1 d . . . 
C32 C 0.8502(5) 0.4816(3) 1.3419(6) 0.0642(18) Uani 1 1 d . . . 
C30 C 0.8497(5) 0.5210(3) 1.1494(6) 0.0658(18) Uani 1 1 d . . . 
H30 H 0.8409 0.5191 1.0659 0.079 Uiso 1 1 calc R . . 
O8 O 0.9094(4) 0.6542(2) 1.1713(5) 0.0871(15) Uani 1 1 d . . . 
C31 C 0.8392(6) 0.4784(3) 1.2181(7) 0.078(2) Uani 1 1 d . . . 
H31 H 0.8248 0.4475 1.1817 0.094 Uiso 1 1 calc R . . 
C19 C 0.7794(5) 0.7234(3) 0.8612(7) 0.0678(19) Uani 1 1 d . . . 
H19A H 0.7687 0.7110 0.7794 0.081 Uiso 1 1 calc R . . 
H19B H 0.8435 0.7407 0.8630 0.081 Uiso 1 1 calc R . . 
C29 C 0.8730(4) 0.5665(3) 1.2011(6) 0.0570(17) Uani 1 1 d . . . 
C34 C 0.8847(5) 0.5696(3) 1.3284(7) 0.076(2) Uani 1 1 d . . . 
H34 H 0.9006 0.6002 1.3653 0.091 Uiso 1 1 calc R . . 
C27 C 1.0347(5) 0.6236(3) 0.8694(7) 0.080(2) Uani 1 1 d U . . 
H27A H 1.0851 0.6476 0.8426 0.096 Uiso 1 1 calc R . . 
H27B H 1.0410 0.6194 0.9564 0.096 Uiso 1 1 calc R . . 
O6 O 0.7202(3) 0.67338(18) 1.0251(5) 0.0854(15) Uani 1 1 d . . . 
C33 C 0.8724(5) 0.5272(3) 1.3957(6) 0.076(2) Uani 1 1 d . . . 
H33 H 0.8790 0.5289 1.4795 0.091 Uiso 1 1 calc R . . 
F5 F 0.6417(3) 0.84359(13) 0.8530(4) 0.0936(13) Uani 1 1 d . . . 
O10 O 0.5540(5) 0.7505(2) 1.0864(5) 0.113(2) Uani 1 1 d . . . 
C23 C 0.9323(5) 0.6429(3) 0.8387(7) 0.072(2) Uani 1 1 d U . . 
H23 H 0.9402 0.6755 0.7973 0.087 Uiso 1 1 calc R . . 
C24 C 0.8918(6) 0.6040(3) 0.7448(6) 0.085(2) Uani 1 1 d U . . 
H24A H 0.8362 0.5851 0.7789 0.102 Uiso 1 1 calc R . . 
H24B H 0.8687 0.6213 0.6724 0.102 Uiso 1 1 calc R . . 
N3 N 0.5420(5) 0.7265(3) 0.9965(8) 0.090(2) Uani 1 1 d . . . 
F4 F 0.6994(4) 0.80126(16) 0.7052(4) 0.1031(15) Uani 1 1 d . . . 
C20 C 0.6960(4) 0.7608(2) 0.8941(6) 0.0550(16) Uani 1 1 d . . . 
H20 H 0.7052 0.7697 0.9797 0.066 Uiso 1 1 calc R . . 
C22 C 0.7071(5) 0.8082(3) 0.8237(6) 0.0647(17) Uani 1 1 d . . . 
C21 C 0.5914(4) 0.7410(2) 0.8811(5) 0.0552(14) Uani 1 1 d . . . 
H21A H 0.5510 0.7667 0.8418 0.066 Uiso 1 1 calc R . . 
H21B H 0.5928 0.7117 0.8283 0.066 Uiso 1 1 calc R . . 
F6 F 0.7975(3) 0.82980(16) 0.8419(5) 0.1102(15) Uani 1 1 d . . . 
Br1 Br 0.16778(8) 1.07635(3) 0.06171(8) 0.1091(4) Uani 1 1 d . . . 
O2 O 0.1448(3) 0.89729(17) 0.4997(4) 0.0727(13) Uani 1 1 d . . . 
C1 C 0.2202(5) 0.8249(3) 0.5702(7) 0.0681(19) Uani 1 1 d . . . 
N2 N 0.1374(4) 0.85353(19) 0.5725(5) 0.0704(16) Uani 1 1 d . . . 
C11 C 0.1226(5) 0.8875(3) 0.3798(6) 0.066(2) Uani 1 1 d . . . 
C17 C 0.1551(5) 0.9814(2) 0.3581(6) 0.072(2) Uani 1 1 d . . . 
H17 H 0.1644 0.9843 0.4414 0.086 Uiso 1 1 calc R . . 
C12 C 0.1326(5) 0.9348(3) 0.3071(6) 0.0621(18) Uani 1 1 d . . . 
C13 C 0.1198(5) 0.9320(3) 0.1825(7) 0.074(2) Uani 1 1 d . . . 
H13 H 0.1034 0.9012 0.1468 0.089 Uiso 1 1 calc R . . 
C15 C 0.1543(6) 1.0190(3) 0.1618(7) 0.076(2) Uani 1 1 d . . . 
O3 O 0.1066(4) 0.8466(2) 0.3431(5) 0.0955(17) Uani 1 1 d . . . 
C16 C 0.1639(6) 1.0239(3) 0.2837(6) 0.077(2) Uani 1 1 d . . . 
H16 H 0.1763 1.0555 0.3177 0.092 Uiso 1 1 calc R . . 
C2 C 0.2213(5) 0.7790(3) 0.6498(7) 0.0661(19) Uani 1 1 d . . . 
H2A H 0.1662 0.7570 0.6269 0.079 Uiso 1 1 calc R . . 
H2B H 0.2106 0.7894 0.7331 0.079 Uiso 1 1 calc R . . 
N1 N 0.4463(6) 0.7620(3) 0.4803(8) 0.104(3) Uani 1 1 d . . . 
O1 O 0.2904(4) 0.83505(19) 0.4994(6) 0.0959(17) Uani 1 1 d . . . 
C7 C -0.0349(5) 0.8790(2) 0.6261(7) 0.081(2) Uani 1 1 d U . . 
H7A H -0.0354 0.8816 0.5383 0.097 Uiso 1 1 calc R . . 
H7B H -0.0885 0.8565 0.6513 0.097 Uiso 1 1 calc R . . 
C4 C 0.3536(7) 0.7367(3) 0.5218(8) 0.108(3) Uani 1 1 d . . . 
H4A H 0.3007 0.7446 0.4646 0.130 Uiso 1 1 calc R . . 
H4B H 0.3644 0.7004 0.5184 0.130 Uiso 1 1 calc R . . 
C14 C 0.1309(5) 0.9741(3) 0.1114(6) 0.079(2) Uani 1 1 d . . . 
H14 H 0.1223 0.9717 0.0280 0.095 Uiso 1 1 calc R . . 
C6 C 0.0663(5) 0.8597(2) 0.6713(6) 0.0655(19) Uani 1 1 d U . . 
H6 H 0.0576 0.8275 0.7141 0.079 Uiso 1 1 calc R . . 
C10 C 0.1026(7) 0.9004(4) 0.7594(7) 0.105(3) Uani 1 1 d U . . 
H10A H 0.1295 0.8850 0.8322 0.126 Uiso 1 1 calc R . . 
H10B H 0.1546 0.9208 0.7221 0.126 Uiso 1 1 calc R . . 
C5 C 0.3084(8) 0.7027(4) 0.7239(11) 0.114(3) Uani 1 1 d U . . 
F3 F 0.2419(5) 0.6710(3) 0.6757(7) 0.163(3) Uani 1 1 d U . . 
C8 C -0.0466(7) 0.9308(3) 0.6837(10) 0.119(3) Uani 1 1 d U . . 
H8A H -0.0283 0.9574 0.6272 0.143 Uiso 1 1 calc R . . 
H8B H -0.1150 0.9362 0.7104 0.143 Uiso 1 1 calc R . . 
C3 C 0.3182(6) 0.7492(3) 0.6425(7) 0.081(2) Uani 1 1 d . . . 
H3 H 0.3699 0.7706 0.6792 0.097 Uiso 1 1 calc R . . 
O4 O 0.4530(7) 0.7597(3) 0.3737(7) 0.157(3) Uani 1 1 d . . . 
C9 C 0.0222(9) 0.9297(4) 0.7871(10) 0.149(4) Uani 1 1 d U . . 
H9A H 0.0442 0.9638 0.8060 0.179 Uiso 1 1 calc R . . 
H9B H -0.0117 0.9160 0.8577 0.179 Uiso 1 1 calc R . . 
C25 C 0.9691(9) 0.5720(4) 0.7171(11) 0.167(5) Uani 1 1 d U . . 
H25A H 0.9962 0.5806 0.6381 0.201 Uiso 1 1 calc R . . 
H25B H 0.9450 0.5374 0.7141 0.201 Uiso 1 1 calc R . . 
O9 O 0.4915(6) 0.6887(3) 0.9952(7) 0.178(4) Uani 1 1 d . . . 
O5 O 0.5054(6) 0.7797(5) 0.5462(9) 0.190(4) Uani 1 1 d . . . 
C26 C 1.0486(7) 0.5766(4) 0.8105(11) 0.153(4) Uani 1 1 d U . . 
H26A H 1.0436 0.5491 0.8685 0.183 Uiso 1 1 calc R . . 
H26B H 1.1143 0.5753 0.7730 0.183 Uiso 1 1 calc R . . 
F2 F 0.3971(4) 0.6780(2) 0.7236(6) 0.142(2) Uani 1 1 d U . . 
F1 F 0.2872(6) 0.7125(3) 0.8318(7) 0.173(3) Uani 1 1 d U . . 
 
loop_ 
 _atom_site_aniso_label 
 _atom_site_aniso_U_11 
 _atom_site_aniso_U_22 
 _atom_site_aniso_U_33 
 _atom_site_aniso_U_23 
 _atom_site_aniso_U_13 
 _atom_site_aniso_U_12 
Br2 0.1327(8) 0.0964(6) 0.0885(6) 0.0294(5) -0.0131(6) -0.0072(6) 
O7 0.083(3) 0.060(3) 0.061(3) 0.006(2) 0.002(3) 0.011(2) 
C28 0.054(4) 0.074(5) 0.072(5) -0.002(4) 0.012(4) 0.010(4) 
C18 0.075(5) 0.060(4) 0.067(4) 0.015(4) 0.013(4) 0.023(4) 
N4 0.079(4) 0.070(4) 0.073(4) 0.016(3) 0.017(3) 0.013(3) 
C32 0.056(4) 0.066(5) 0.071(5) 0.012(4) -0.009(4) 0.004(4) 
C30 0.077(5) 0.067(5) 0.053(4) 0.009(4) 0.004(4) 0.005(4) 
O8 0.090(3) 0.074(3) 0.098(4) -0.001(3) -0.001(3) 0.003(3) 
C31 0.086(5) 0.073(5) 0.076(5) -0.015(4) -0.009(5) 0.008(4) 
C19 0.068(4) 0.063(5) 0.072(4) 0.005(4) 0.007(4) -0.004(4) 
C29 0.048(4) 0.056(4) 0.067(4) 0.004(4) -0.007(3) 0.013(3) 
C34 0.074(5) 0.078(5) 0.075(5) -0.008(5) 0.004(4) -0.006(4) 
C27 0.048(4) 0.097(5) 0.094(5) -0.023(4) -0.002(4) 0.000(4) 
O6 0.071(3) 0.085(3) 0.100(4) 0.041(3) 0.032(3) 0.015(3) 
C33 0.092(6) 0.085(6) 0.051(4) 0.003(4) -0.015(4) 0.008(4) 
F5 0.112(3) 0.059(2) 0.109(3) 0.008(2) 0.036(3) 0.026(2) 
O10 0.134(5) 0.124(5) 0.083(4) -0.026(4) 0.029(4) 0.018(4) 
C23 0.068(4) 0.072(4) 0.077(4) -0.002(4) 0.002(4) 0.008(3) 
C24 0.073(5) 0.109(5) 0.074(4) -0.008(4) -0.014(4) 0.008(4) 
N3 0.059(4) 0.107(5) 0.106(5) 0.006(5) 0.011(4) -0.018(4) 
F4 0.145(4) 0.099(3) 0.065(3) 0.020(2) 0.017(3) 0.035(3) 
C20 0.058(4) 0.048(3) 0.059(4) -0.002(3) 0.007(3) 0.006(3) 
C22 0.072(4) 0.059(4) 0.063(4) 0.002(3) 0.014(3) 0.005(4) 
C21 0.048(3) 0.060(3) 0.058(4) -0.006(3) 0.002(3) 0.005(3) 
F6 0.098(3) 0.078(3) 0.156(4) 0.026(3) 0.028(3) -0.018(3) 
Br1 0.1470(9) 0.0938(6) 0.0866(6) 0.0277(5) -0.0126(7) -0.0057(6) 
O2 0.085(3) 0.065(3) 0.068(3) 0.006(3) 0.011(3) 0.018(3) 
C1 0.056(4) 0.073(5) 0.075(5) 0.003(4) 0.006(4) -0.009(4) 
N2 0.077(4) 0.055(3) 0.079(4) 0.017(3) 0.025(3) 0.027(3) 
C11 0.069(5) 0.059(5) 0.071(5) 0.001(4) -0.007(4) 0.010(4) 
C17 0.094(5) 0.071(5) 0.052(4) -0.007(4) -0.005(4) 0.008(4) 
C12 0.056(4) 0.059(4) 0.071(5) -0.004(4) 0.007(4) 0.011(3) 
C13 0.088(5) 0.066(5) 0.069(5) -0.013(4) -0.039(4) 0.014(4) 
C15 0.087(5) 0.080(6) 0.060(4) 0.004(4) 0.004(5) 0.013(5) 
O3 0.136(5) 0.066(3) 0.085(4) -0.008(3) -0.016(4) -0.015(3) 
C16 0.106(6) 0.059(5) 0.066(5) 0.004(4) -0.007(5) -0.005(4) 
C2 0.053(4) 0.068(5) 0.077(5) 0.014(4) 0.007(4) 0.009(3) 
N1 0.084(5) 0.137(7) 0.092(6) 0.043(5) 0.044(5) 0.038(5) 
O1 0.073(3) 0.085(3) 0.130(5) 0.030(3) 0.032(3) 0.014(3) 
C7 0.074(5) 0.077(4) 0.090(5) -0.010(4) 0.007(4) -0.016(4) 
C4 0.134(8) 0.097(6) 0.093(6) -0.010(5) 0.008(6) 0.023(6) 
C14 0.085(5) 0.093(6) 0.058(4) 0.004(5) -0.016(4) 0.005(5) 
C6 0.065(4) 0.067(4) 0.065(4) 0.010(3) 0.025(4) 0.013(3) 
C10 0.089(5) 0.142(7) 0.084(5) -0.022(5) -0.007(4) 0.024(5) 
C5 0.121(6) 0.100(6) 0.121(6) 0.010(5) 0.019(6) 0.073(5) 
F3 0.190(6) 0.107(4) 0.193(6) 0.037(4) 0.003(5) -0.027(4) 
C8 0.106(5) 0.104(6) 0.148(7) -0.032(6) -0.031(6) 0.035(5) 
C3 0.083(5) 0.081(5) 0.078(5) 0.004(4) 0.018(4) 0.019(4) 
O4 0.201(8) 0.182(7) 0.087(5) 0.017(5) 0.032(5) 0.087(6) 
C9 0.170(8) 0.122(6) 0.155(7) -0.059(6) -0.038(7) 0.057(6) 
C25 0.161(8) 0.168(8) 0.172(8) -0.079(7) -0.077(7) 0.037(7) 
O9 0.149(6) 0.230(9) 0.154(6) 0.048(6) -0.015(6) -0.115(7) 
O5 0.087(5) 0.315(12) 0.168(8) -0.027(8) -0.001(5) -0.019(6) 
C26 0.114(6) 0.157(7) 0.187(8) -0.057(7) -0.053(6) 0.056(6) 
F2 0.126(4) 0.147(4) 0.152(4) 0.040(4) 0.020(3) 0.059(4) 
F1 0.203(6) 0.186(6) 0.131(4) 0.067(4) 0.054(4) 0.096(5) 
 
_geom_special_details 
; 
 All esds (except the esd in the dihedral angle between two l.s. planes) 
 are estimated using the full covariance matrix.  The cell esds are taken 
 into account individually in the estimation of esds in distances, angles 
 and torsion angles; correlations between esds in cell parameters are only 
 used when they are defined by crystal symmetry.  An approximate (isotropic) 
 treatment of cell esds is used for estimating esds involving l.s. planes. 
; 
 
loop_ 
 _geom_bond_atom_site_label_1 
 _geom_bond_atom_site_label_2 
 _geom_bond_distance 
 _geom_bond_site_symmetry_2 
 _geom_bond_publ_flag 
Br2 C32 1.887(6) . ? 
O7 C28 1.345(8) . ? 
O7 N4 1.422(7) . ? 
C28 O8 1.222(8) . ? 
C28 C29 1.468(9) . ? 
C18 O6 1.200(7) . ? 
C18 N4 1.341(8) . ? 
C18 C19 1.502(9) . ? 
N4 C23 1.462(9) . ? 
C32 C33 1.373(8) . ? 
C32 C31 1.376(9) . ? 
C30 C31 1.364(8) . ? 
C30 C29 1.366(9) . ? 
C30 H30 0.9300 . ? 
C31 H31 0.9300 . ? 
C19 C20 1.532(8) . ? 
C19 H19A 0.9700 . ? 
C19 H19B 0.9700 . ? 
C29 C34 1.415(10) . ? 
C34 C33 1.353(9) . ? 
C34 H34 0.9300 . ? 
C27 C26 1.412(11) . ? 
C27 C23 1.497(9) . ? 
C27 H27A 0.9700 . ? 
C27 H27B 0.9700 . ? 
C33 H33 0.9300 . ? 
F5 C22 1.320(7) . ? 
O10 N3 1.187(8) . ? 
C23 C24 1.556(9) . ? 
C23 H23 0.9800 . ? 
C24 C25 1.368(12) . ? 
C24 H24A 0.9700 . ? 
C24 H24B 0.9700 . ? 
N3 O9 1.204(9) . ? 
N3 C21 1.483(9) . ? 
F4 C22 1.323(8) . ? 
C20 C22 1.479(8) . ? 
C20 C21 1.498(8) . ? 
C20 H20 0.9800 . ? 
C22 F6 1.350(8) . ? 
C21 H21A 0.9700 . ? 
C21 H21B 0.9700 . ? 
Br1 C15 1.882(7) . ? 
O2 C11 1.379(8) . ? 
O2 N2 1.411(6) . ? 
C1 O1 1.249(8) . ? 
C1 N2 1.340(8) . ? 
C1 C2 1.497(9) . ? 
N2 C6 1.453(8) . ? 
C11 O3 1.174(8) . ? 
C11 C12 1.489(9) . ? 
C17 C12 1.387(9) . ? 
C17 C16 1.394(8) . ? 
C17 H17 0.9300 . ? 
C12 C13 1.386(10) . ? 
C13 C14 1.368(9) . ? 
C13 H13 0.9300 . ? 
C15 C14 1.346(9) . ? 
C15 C16 1.357(9) . ? 
C16 H16 0.9300 . ? 
C2 C3 1.515(9) . ? 
C2 H2A 0.9700 . ? 
C2 H2B 0.9700 . ? 
N1 O5 1.170(11) . ? 
N1 O4 1.180(9) . ? 
N1 C4 1.481(12) . ? 
C7 C8 1.515(10) . ? 
C7 C6 1.527(9) . ? 
C7 H7A 0.9700 . ? 
C7 H7B 0.9700 . ? 
C4 C3 1.451(11) . ? 
C4 H4A 0.9700 . ? 
C4 H4B 0.9700 . ? 
C14 H14 0.9300 . ? 
C6 C10 1.528(10) . ? 
C6 H6 0.9800 . ? 
C10 C9 1.356(12) . ? 
C10 H10A 0.9700 . ? 
C10 H10B 0.9700 . ? 
C5 F1 1.250(11) . ? 
C5 F3 1.332(12) . ? 
C5 F2 1.352(10) . ? 
C5 C3 1.527(12) . ? 
C8 C9 1.464(13) . ? 
C8 H8A 0.9700 . ? 
C8 H8B 0.9700 . ? 
C3 H3 0.9800 . ? 
C9 H9A 0.9700 . ? 
C9 H9B 0.9700 . ? 
C25 C26 1.485(13) . ? 
C25 H25A 0.9700 . ? 
C25 H25B 0.9700 . ? 
C26 H26A 0.9700 . ? 
C26 H26B 0.9700 . ? 
 
loop_ 
 _geom_angle_atom_site_label_1 
 _geom_angle_atom_site_label_2 
 _geom_angle_atom_site_label_3 
 _geom_angle 
 _geom_angle_site_symmetry_1 
 _geom_angle_site_symmetry_3 
 _geom_angle_publ_flag 
C28 O7 N4 113.6(5) . . ? 
O8 C28 O7 123.7(7) . . ? 
O8 C28 C29 124.9(7) . . ? 
O7 C28 C29 111.4(7) . . ? 
O6 C18 N4 121.7(6) . . ? 
O6 C18 C19 122.5(6) . . ? 
N4 C18 C19 115.3(6) . . ? 
C18 N4 O7 113.6(5) . . ? 
C18 N4 C23 128.7(6) . . ? 
O7 N4 C23 110.5(5) . . ? 
C33 C32 C31 120.4(7) . . ? 
C33 C32 Br2 120.2(5) . . ? 
C31 C32 Br2 119.4(6) . . ? 
C31 C30 C29 121.2(6) . . ? 
C31 C30 H30 119.4 . . ? 
C29 C30 H30 119.4 . . ? 
C30 C31 C32 119.2(7) . . ? 
C30 C31 H31 120.4 . . ? 
C32 C31 H31 120.4 . . ? 
C18 C19 C20 111.5(6) . . ? 
C18 C19 H19A 109.3 . . ? 
C20 C19 H19A 109.3 . . ? 
C18 C19 H19B 109.3 . . ? 
C20 C19 H19B 109.3 . . ? 
H19A C19 H19B 108.0 . . ? 
C30 C29 C34 119.3(7) . . ? 
C30 C29 C28 122.6(6) . . ? 
C34 C29 C28 118.0(7) . . ? 
C33 C34 C29 118.9(7) . . ? 
C33 C34 H34 120.5 . . ? 
C29 C34 H34 120.5 . . ? 
C26 C27 C23 108.4(7) . . ? 
C26 C27 H27A 110.0 . . ? 
C23 C27 H27A 110.0 . . ? 
C26 C27 H27B 110.0 . . ? 
C23 C27 H27B 110.0 . . ? 
H27A C27 H27B 108.4 . . ? 
C34 C33 C32 120.9(7) . . ? 
C34 C33 H33 119.5 . . ? 
C32 C33 H33 119.5 . . ? 
N4 C23 C27 115.9(7) . . ? 
N4 C23 C24 112.9(6) . . ? 
C27 C23 C24 104.1(6) . . ? 
N4 C23 H23 107.9 . . ? 
C27 C23 H23 107.9 . . ? 
C24 C23 H23 107.9 . . ? 
C25 C24 C23 107.1(7) . . ? 
C25 C24 H24A 110.3 . . ? 
C23 C24 H24A 110.3 . . ? 
C25 C24 H24B 110.3 . . ? 
C23 C24 H24B 110.3 . . ? 
H24A C24 H24B 108.6 . . ? 
O10 N3 O9 121.8(9) . . ? 
O10 N3 C21 121.3(7) . . ? 
O9 N3 C21 116.9(8) . . ? 
C22 C20 C21 109.8(5) . . ? 
C22 C20 C19 110.4(5) . . ? 
C21 C20 C19 115.5(5) . . ? 
C22 C20 H20 106.9 . . ? 
C21 C20 H20 106.9 . . ? 
C19 C20 H20 106.9 . . ? 
F5 C22 F4 106.7(6) . . ? 
F5 C22 F6 104.8(5) . . ? 
F4 C22 F6 106.0(6) . . ? 
F5 C22 C20 113.9(5) . . ? 
F4 C22 C20 113.2(6) . . ? 
F6 C22 C20 111.6(6) . . ? 
N3 C21 C20 115.0(5) . . ? 
N3 C21 H21A 108.5 . . ? 
C20 C21 H21A 108.5 . . ? 
N3 C21 H21B 108.5 . . ? 
C20 C21 H21B 108.5 . . ? 
H21A C21 H21B 107.5 . . ? 
C11 O2 N2 112.2(5) . . ? 
O1 C1 N2 120.7(7) . . ? 
O1 C1 C2 122.2(7) . . ? 
N2 C1 C2 117.0(6) . . ? 
C1 N2 O2 113.2(5) . . ? 
C1 N2 C6 128.1(6) . . ? 
O2 N2 C6 112.4(5) . . ? 
O3 C11 O2 122.8(7) . . ? 
O3 C11 C12 127.0(7) . . ? 
O2 C11 C12 109.9(6) . . ? 
C12 C17 C16 119.5(6) . . ? 
C12 C17 H17 120.2 . . ? 
C16 C17 H17 120.2 . . ? 
C13 C12 C17 118.4(7) . . ? 
C13 C12 C11 118.6(7) . . ? 
C17 C12 C11 123.0(6) . . ? 
C14 C13 C12 120.8(7) . . ? 
C14 C13 H13 119.6 . . ? 
C12 C13 H13 119.6 . . ? 
C14 C15 C16 120.9(7) . . ? 
C14 C15 Br1 119.2(6) . . ? 
C16 C15 Br1 119.8(6) . . ? 
C15 C16 C17 120.0(7) . . ? 
C15 C16 H16 120.0 . . ? 
C17 C16 H16 120.0 . . ? 
C1 C2 C3 113.4(6) . . ? 
C1 C2 H2A 108.9 . . ? 
C3 C2 H2A 108.9 . . ? 
C1 C2 H2B 108.9 . . ? 
C3 C2 H2B 108.9 . . ? 
H2A C2 H2B 107.7 . . ? 
O5 N1 O4 126.1(10) . . ? 
O5 N1 C4 123.5(8) . . ? 
O4 N1 C4 110.3(11) . . ? 
C8 C7 C6 104.8(6) . . ? 
C8 C7 H7A 110.8 . . ? 
C6 C7 H7A 110.8 . . ? 
C8 C7 H7B 110.8 . . ? 
C6 C7 H7B 110.8 . . ? 
H7A C7 H7B 108.9 . . ? 
C3 C4 N1 116.9(8) . . ? 
C3 C4 H4A 108.1 . . ? 
N1 C4 H4A 108.1 . . ? 
C3 C4 H4B 108.1 . . ? 
N1 C4 H4B 108.1 . . ? 
H4A C4 H4B 107.3 . . ? 
C15 C14 C13 120.3(7) . . ? 
C15 C14 H14 119.9 . . ? 
C13 C14 H14 119.9 . . ? 
N2 C6 C7 111.7(6) . . ? 
N2 C6 C10 110.4(6) . . ? 
C7 C6 C10 104.7(6) . . ? 
N2 C6 H6 110.0 . . ? 
C7 C6 H6 110.0 . . ? 
C10 C6 H6 110.0 . . ? 
C9 C10 C6 107.1(8) . . ? 
C9 C10 H10A 110.3 . . ? 
C6 C10 H10A 110.3 . . ? 
C9 C10 H10B 110.3 . . ? 
C6 C10 H10B 110.3 . . ? 
H10A C10 H10B 108.6 . . ? 
F1 C5 F3 111.0(11) . . ? 
F1 C5 F2 107.5(9) . . ? 
F3 C5 F2 106.3(8) . . ? 
F1 C5 C3 114.4(9) . . ? 
F3 C5 C3 109.1(9) . . ? 
F2 C5 C3 108.2(9) . . ? 
C9 C8 C7 104.2(7) . . ? 
C9 C8 H8A 110.9 . . ? 
C7 C8 H8A 110.9 . . ? 
C9 C8 H8B 110.9 . . ? 
C7 C8 H8B 110.9 . . ? 
H8A C8 H8B 108.9 . . ? 
C4 C3 C2 116.5(7) . . ? 
C4 C3 C5 112.6(7) . . ? 
C2 C3 C5 108.2(6) . . ? 
C4 C3 H3 106.3 . . ? 
C2 C3 H3 106.3 . . ? 
C5 C3 H3 106.3 . . ? 
C10 C9 C8 109.4(8) . . ? 
C10 C9 H9A 109.8 . . ? 
C8 C9 H9A 109.8 . . ? 
C10 C9 H9B 109.8 . . ? 
C8 C9 H9B 109.8 . . ? 
H9A C9 H9B 108.3 . . ? 
C24 C25 C26 109.5(8) . . ? 
C24 C25 H25A 109.8 . . ? 
C26 C25 H25A 109.8 . . ? 
C24 C25 H25B 109.8 . . ? 
C26 C25 H25B 109.8 . . ? 
H25A C25 H25B 108.2 . . ? 
C27 C26 C25 107.3(8) . . ? 
C27 C26 H26A 110.3 . . ? 
C25 C26 H26A 110.3 . . ? 
C27 C26 H26B 110.3 . . ? 
C25 C26 H26B 110.3 . . ? 
H26A C26 H26B 108.5 . . ? 
 
_diffrn_measured_fraction_theta_max    1.000 
_diffrn_reflns_theta_full              27.49 
_diffrn_measured_fraction_theta_full   1.000 
_refine_diff_density_max    0.507 
_refine_diff_density_min   -0.440 
_refine_diff_density_rms    0.057 
